# Supplementary material for: Improvements in Glycemic, Micronutrient, and Mineral Indices in Arab Adults with Pre-Diabetes Post-Lifestyle Modification Program
Source: PubMed Central journal article supplement (PMC6893589; doi:10.3390/nu11112775), 2019-11-15
Supplement: nutrients-11-02775-s001.pdf [file nutrients-11-02775-s001.pdf]

# Improvements in Glycemic and Dietary Nutrient Indices in Arab Adults with Pre-Diabetes post Lifestyle Modification Program

**Table S1:** Other anthropometric and biochemical characteristics of study groups at baseline:

| Parameters                 | GA (N=75)       | Guidance (N=64) | p -Value    |
|----------------------------|-----------------|-----------------|-------------|
| Waist (cm)                 | 95.91 ± 12.6    | 101.3 ± 13.4    | <b>0.02</b> |
| Hip circumference (cm)     | 108.21 ± 9.8    | 113.27 ± 10.9   | <b>0.01</b> |
| Systolic BP (mmHg)         | 117.35 ± 14.4   | 123.23 ± 14.1   | <b>0.02</b> |
| Diastolic BP (mmHg)        | 75.08 ± 9.7     | 78.66 ± 11.3    | 0.06        |
| Total Cholesterol (mmol/l) | 5.11 ± 1.0      | 5.10 ± 0.9      | 0.48        |
| LDL-C mmol/l)              | 3.11 ± 0.9      | 3.10 ± 0.8      | 0.97        |
| HDL-C (mmol/l)             | 1.18 ± 0.4      | 1.22 ± 0.3      | 0.46        |
| Triglycerides (mmol/l)     | 1.47 (1.1,2.03) | 1.36 (0.9,1.7)  | 0.06        |

Note: LDL-C and HDL\_C are low-density and high-density lipoproteins. Data presented as Mean ± SD for continuous normal variables; medians (25th percentile, 75th percentile) for continuous non-normal variables. The difference between groups at baseline was calculated by independent samples t-test and Mann-Whitney U-test for Gaussian and non-Gaussian variables respectively. p<0.05 is taken as significant.

**Table S2:** Other biochemical characteristics of study groups' overtime.

| Parameters                 |          | GA (N=75)      | Guidance (N=64) |
|----------------------------|----------|----------------|-----------------|
| Waist (cm)                 | Baseline | 95.91 ± 12.6   | 101.30 ± 13.4   |
|                            | 6-months | 97.84 ± 12.2   | 100.58 ± 13.4   |
| Hip circumference (cm)     | Baseline | 108.21 ± 9.8   | 113.27 ± 10.9   |
|                            | 6-months | 109.57 ± 10.0  | 110.59 ± 11.0** |
| Systolic BP (mmHg)         | Baseline | 117.35 ± 14.4  | 123.23 ± 14.1   |
|                            | 6-months | 115.72 ± 10.7  | 116.95 ± 12.2** |
| Diastolic BP (mmHg)        | Baseline | 75.08 ± 9.7    | 78.66 ± 11.3    |
|                            | 6-months | 74.61 ± 7.8    | 75.39 ± 9.6*    |
| Total Cholesterol (mmol/l) | Baseline | 5.11 ± 1.0     | 5.00 ± 0.9      |
|                            | 6-months | 5.07 ± 1.1     | 4.78 ± 1.0*     |
| HDL-C (mmol/l)             | Baseline | 1.18 ± 0.4     | 1.22 ± 0.3      |
|                            | 6-months | 1.09 ± 0.4     | 1.17 ± 0.4      |
| LDL-C mmol/l)              | Baseline | 3.11 ± 0.9     | 3.10 ± 0.8      |
|                            | 6-months | 3.25 ± 1.0     | 2.96 ± 0.9      |
| Triglycerides (mmol/l)     | Baseline | 1.47 (1.1,2.2) | 1.36(1.0,1.7)   |
|                            | 6-months | 1.39 (1.0,1.8) | 1.26(0.9,1.6)   |

Note: LDL-C and HDL\_C are low-density and high-density lipoproteins. Data presented as Mean  $\pm$  SD for continuous normal variables; medians (25th percentile, 75th percentile) for continuous non-normal variables. The difference within groups compared with baseline was calculated by repeated measures t-test and Wilcoxon signed-rank test for Gaussian and non-Gaussian variables respectively. \*\*depicts p-value<0.01 and \* depicts p-value<0.05.

**Table S3:** Dietary preferences of study groups' overtime.

|                                      |          | GA (N=75)        |              | Guidance (N=64)  |                 |
|--------------------------------------|----------|------------------|--------------|------------------|-----------------|
|                                      |          | Median (Q1, Q3)  | p            | Median (Q1, Q3)  | p               |
| Full Fat Dietary Products/week       | Baseline | 2.50 (1.6 , 4.0) | 0.272        | 2.56 (1.5 , 4.6) | <b>0.04</b>     |
|                                      | 6-months | 3.00 (2.0 , 4.0) |              | 2.00 (1.6 , 3.0) |                 |
| Low Fat Dietary Products/week        | Baseline | 1.40 (1.1 , 3.1) | 0.222        | 1.40 (1.1 , 2.2) | <b>0.003</b>    |
|                                      | 6-months | 1.45 (1.1 , 2.4) |              | 1.72 (1.3 , 2.8) |                 |
| Red Meat/week                        | Baseline | 1.50 (0.8 , 3.5) | 0.687        | 1.50 (0.8 , 3.5) | 0.076           |
|                                      | 6-months | 1.50 (1.5 , 3.5) |              | 1.50 (0.8 , 1.5) |                 |
| White Meat/week                      | Baseline | 3.00 (1.0 , 7.0) | <b>0.010</b> | 3.00 (3.0 , 3.0) | <b>0.016</b>    |
|                                      | 6-months | 3.00 (3.0 , 7.0) |              | 3.00 (3.0 , 7.0) |                 |
| Fish Meat/week                       | Baseline | 0.25 (0.1 , 1.0) | 0.570        | 0.25 (0.1 , 0.3) | <b>0.038</b>    |
|                                      | 6-months | 0.25 (0.1 , 1.0) |              | 0.25 (0.2 , 1.0) |                 |
| Pulses, Legumes or Beans/week        | Baseline | 1.50 (1.5 , 3.5) | 0.650        | 1.50 (0.8 , 3.5) | 0.815           |
|                                      | 6-months | 1.50 (1.5 , 3.5) |              | 1.50 (1.5 , 2.3) |                 |
| Fruits and/or Vegetables/week        | Baseline | 3.00 (2.0 , 5.0) | 0.114        | 2.00 (1.0 , 3.0) | 0.493           |
|                                      | 6-months | 3.00 (1.6 , 5.0) |              | 2.00 (1.0 , 4.0) |                 |
| White Bread/week                     | Baseline | 6.00 (3.0 , 6.0) | 0.523        | 6.00 (3.0 , 6.0) | <b>&lt;0.01</b> |
|                                      | 6-months | 6.00 (3.0 , 6.0) |              | 4.00 (3.0 , 6.0) |                 |
| Whole meal Bread/week                | Baseline | 1.50 (0.1 , 3.5) | 0.102        | 1.25 (0.5 , 3.0) | <b>&lt;0.01</b> |
|                                      | 6-months | 0.56 (0.1 , 3.5) |              | 1.50 (0.2 , 3.5) |                 |
| Soft drinks and/or Fruit Juices/week | Baseline | 3.00 (1.5 , 4.5) | 0.301        | 2.25 (1.4 , 4.1) | 0.166           |
|                                      | 6-months | 3.00 (2.0 , 4.5) |              | 2.25 (1.4 , 3.0) |                 |

Note: The data represents the dietary preferences of the participants in the two study groups at baseline and after intervention calculated as frequency/week. Data is presented as median (25th percentile, 75th percentile).

The difference within groups at end of study was compared with baseline by Wilcoxon signed-rank test. P-value<0.05 is considered significant.

Table S3 shows the changes in dietary preferences of the two study groups at baseline and end of study. Participants in the guidance group reduced their consumption of full fat dietary products from median 2.56 times to 2.00 times per week ( $p<0.05$ ), while preferred to consume more of low fat dietary products instead from 1.40 times to 1.70 times per week ( $p<0.01$ ). The consumption of red meat in this group was 1.50 times/week and didn't change overtime, however, white meat (chicken etc) and fish meat consumption increased modestly at end of study compared to baseline. Similarly, in this group, the consumption of white bread decreased from 6 times/week to 4 times/week on an average ( $p<0.01$ ) while it got replaced with whole meal bread products from 1.25 to 1.50 times/week ( $p<0.01$ ).
